# Supplementary material for: OMTools: a software package for visualizing and processing optical mapping data
Source: PubMed Central journal article supplement — Bioinformatics. 2017 May 12;33(18):2933–5. doi: 10.1093/bioinformatics/btx317 (PMC5870549; doi:10.1093/bioinformatics/btx317), 2017-05-12
Supplement: btx317_supplementaryinformation.pdf [file btx317_supplementaryinformation.pdf]

Supplementary Table S1. Types of visualization in OMView

| <b>Types of visualization</b>  | <b>Functions</b>                                                                               |
|--------------------------------|------------------------------------------------------------------------------------------------|
| <b>Regional view</b>           | Display <u>alignments</u> as an overview at a <u>selected region</u>                           |
| <b>Anchor view</b>             | Display <u>alignments</u> that match <u>selected signals</u> to validate structural variations |
| <b>Alignment view</b>          | Display <u>alignment detail</u> of a single molecule                                           |
| <b>Multiple alignment view</b> | Display the <u>multiple alignment</u> of all queries for genome comparison                     |
| <b>Molecule view</b>           | Display <u>molecules</u> for data inspection                                                   |

Supplementary Table S2. Features in OMView

|                                | <b>Details</b>                                                                                                                                                                                                                    |
|--------------------------------|-----------------------------------------------------------------------------------------------------------------------------------------------------------------------------------------------------------------------------------|
| <b>Visualization types</b>     | Supported multiple visualization types for different objectives, including overview of alignment at a region, structural variations validations, detailed view of an alignment, multiple alignment and inspection of data quality |
| <b>Visualization Interface</b> | Color representation on segment stretching in molecules                                                                                                                                                                           |
|                                | Tabbed browsing                                                                                                                                                                                                                   |
|                                | Multiple panels for direct comparison across different samples                                                                                                                                                                    |
|                                | Command-line arguments input for easy graphics generation                                                                                                                                                                         |
| <b>Performance</b>             | High loading speed, especially on visualizing large data set                                                                                                                                                                      |
| <b>Supported data formats</b>  | Supported a wide range of data, alignment and annotation formats in optical mapping                                                                                                                                               |
|                                | Supported vector graphics export                                                                                                                                                                                                  |

Supplementary Table S3. Types of supported data formats in OMTools.

OMTools supports data formats used by OpGen Inc. and BioNano Genomics Inc., alignment results by different alignment methods and various common annotation formats. OMView also supports image export in different formats.

|                           | <b>Formats</b>                                                                     |
|---------------------------|------------------------------------------------------------------------------------|
| Optical mapping molecules | REF, FA01, SPOTS, DATA, SDATA, BNX, CMAP, OPT, SILICO, and OpGen XML formats       |
| Alignment results         | OMA, OMD, XMAP, Valouev <i>et al.</i> , SOMA v2 Unique Match, and Twin PSL formats |
| Annotation                | BED, GFF/GTF/GVF, and OSV                                                          |
| Image                     | SVG, PNG and JPEG/JPG                                                              |

Supplementary Table S4. List of modules in OMTools

| <b>Modules</b>                    | <b>Description</b>                                                                                      |
|-----------------------------------|---------------------------------------------------------------------------------------------------------|
| <b>Mapper</b>                     |                                                                                                         |
| OMBlastMapper                     | Aligns query optical maps to reference optical maps using the OMBlast algorithm                         |
| OMHAMapper                        | Aligns query optical maps to reference optical maps using the OMHA algorithm                            |
| OMFMMapper                        | Aligns query optical maps to reference optical maps using the OMFMM algorithm                           |
| PairwiseAlignment                 | Performs pairwise alignment between each pair of optical map data sets from multiple optical map files. |
| <b>FastaTools</b>                 |                                                                                                         |
| FastaToOM                         | Performs an <i>in silico</i> digestion on DNA sequence and provides statistics for nicking site breaks  |
| <b>Data Tools</b>                 |                                                                                                         |
| DataTools                         | Provides basic functions for manipulation of optical mapping data                                       |
| DataStatistics                    | Generates basic statistics for optical mapping data                                                     |
| DuplicatedMoleculesDetection      | Detects duplicated entries in an optical map data set                                                   |
| DuplicatedMoleculesRemover        | Removes duplicated entries in an optical map data set                                                   |
| <b>Simulation</b>                 |                                                                                                         |
| OptMapDataGenerator               | Generates simulated optical mapping data from a reference according to specified error model            |
| RandomReferenceGenerator          | Generates random reference according to the given signal density                                        |
| <b>Alignment Tools</b>            |                                                                                                         |
| ResultTools                       | Provides basic functions for manipulation of alignment results                                          |
| ResultMerger                      | Merges alignment results from different alignment methods                                               |
| ResultStatistics                  | Generates basic statistics for alignment results                                                        |
| PrecisionRecallGraphDataGenerator | Generates precision-recall graph data for alignment performance analysis                                |
| <b>Visualization</b>              |                                                                                                         |
| OMView                            | Provides visualization of optical maps                                                                  |
